# Supplementary material
Source: PubMed Central journal article supplement (PMC1636095)

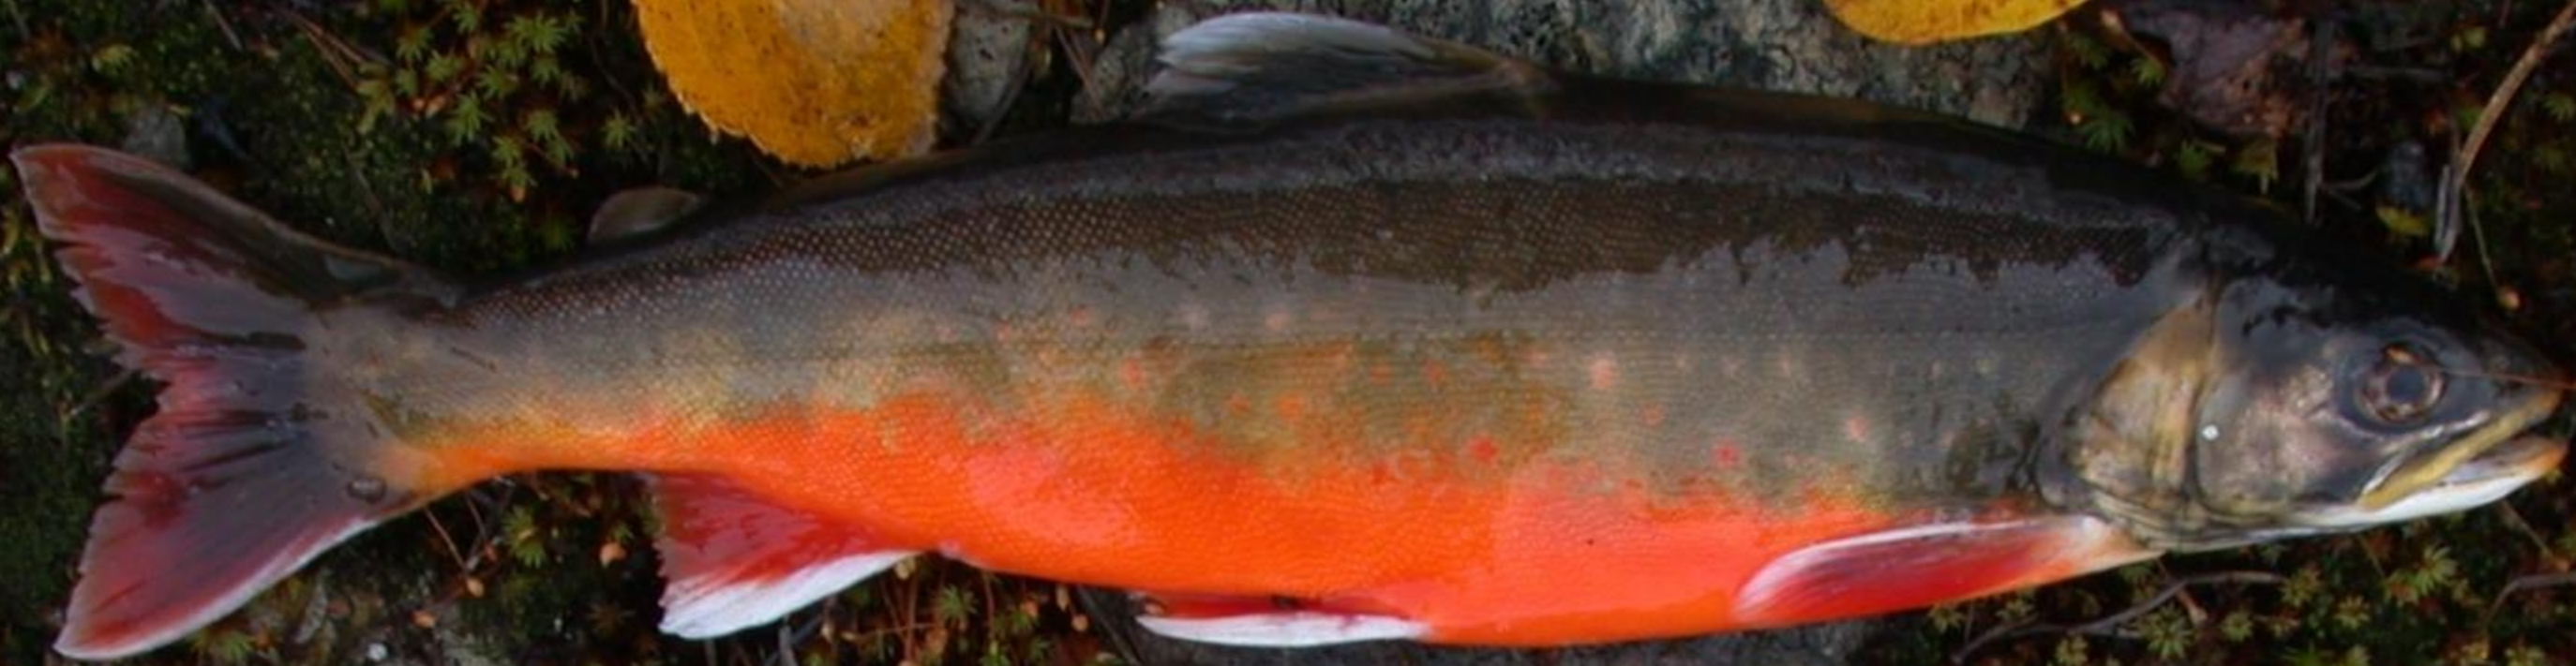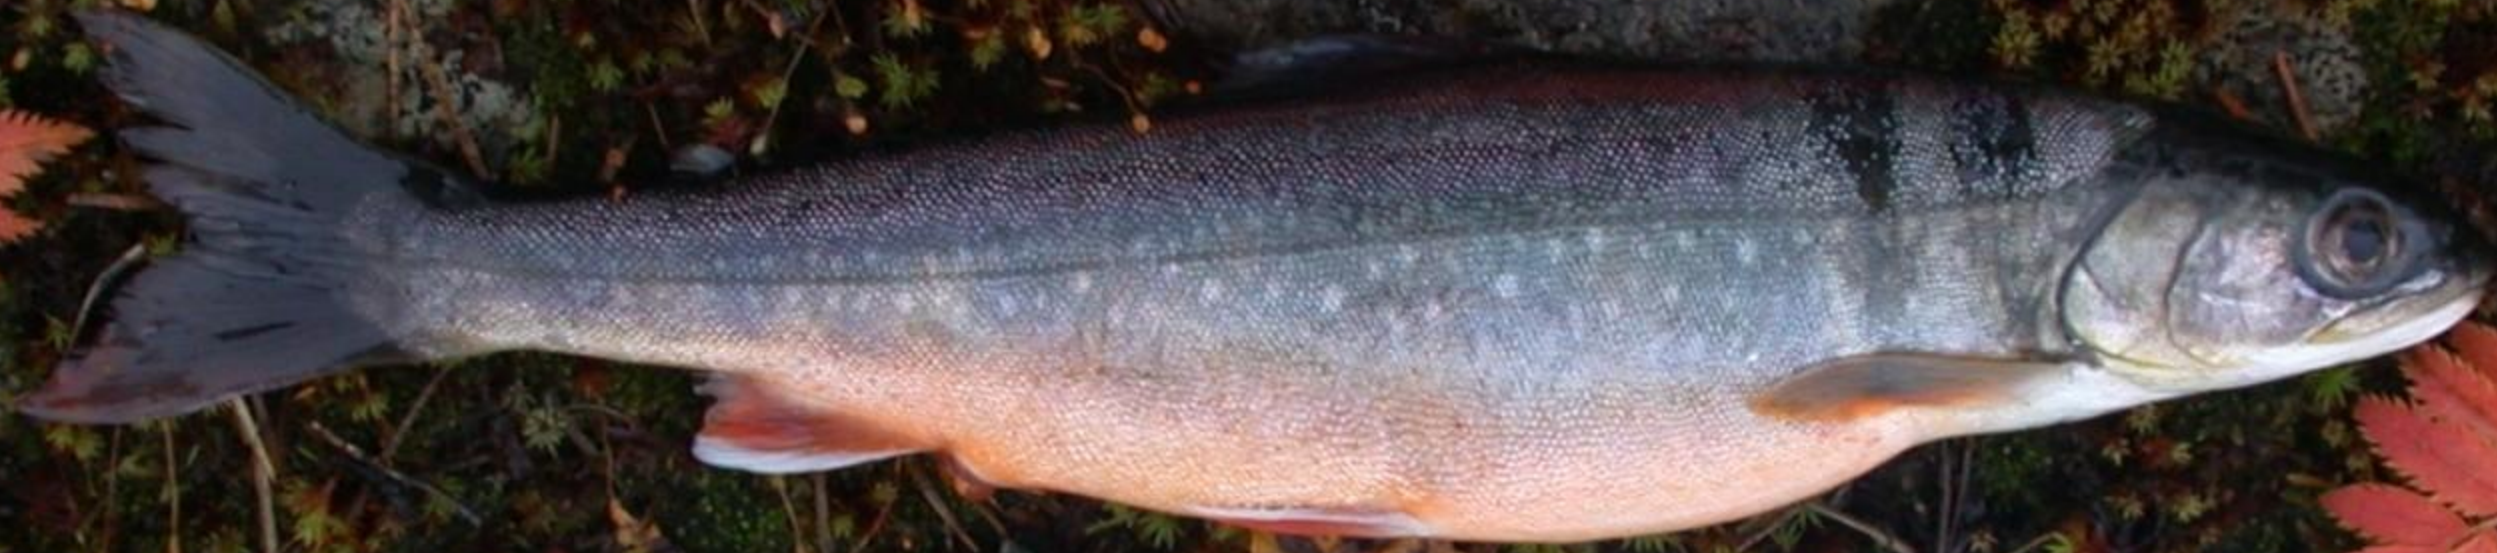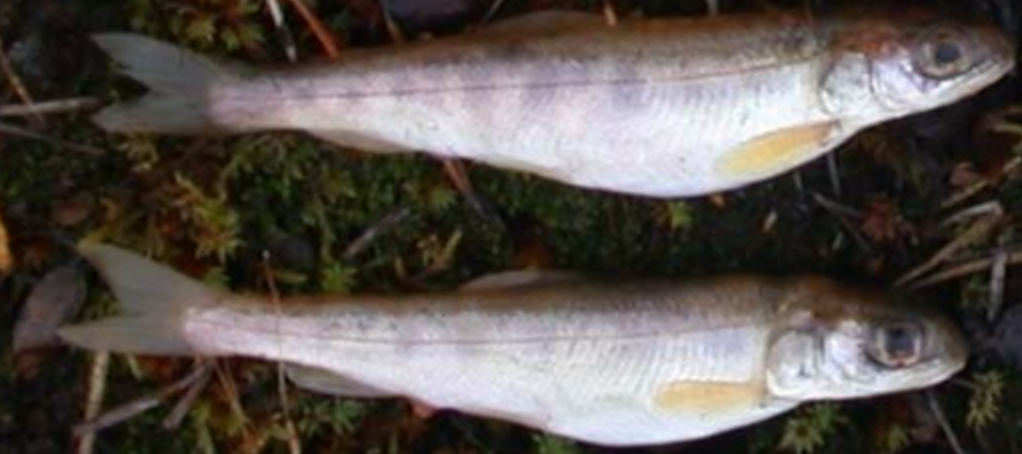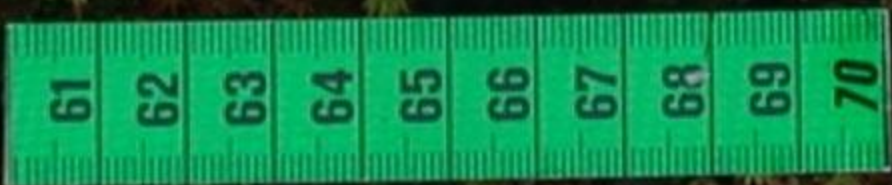

**Fjellfrøsvatn**  
**September 2003**

Supplement: rspb20063582s05.pdf [file rspb20063582s05.pdf]
